# Supplementary material for: Microfluidic magnetic droplet-based chemiluminescence enzyme immunoassay for multiplex sepsis biomarker screening
Source: Royal Society of Chemistry journal article supplement (doi:10.1039/d4an01253d), 2025-01-01
Supplement: d4an01253d1.pdf [file d4an01253d1.pdf]

## Supplementary

### **Microfluidic magnetic droplet-based chemiluminescence enzyme immunoassay for multiplex sepsis biomarkers screening**

Jiayue Huang <sup>1,2</sup>, Jinbo Li <sup>3,4</sup>, Nan Wu <sup>5</sup>, Xin Yang <sup>3,4</sup>, Lexiang Zhang <sup>4,\*</sup>, Feika Bian  
<sup>1,3,\*</sup>, Danhong Hu <sup>1,\*</sup>

<sup>1</sup> Department of Neurological Rehabilitation, The Second Affiliated Hospital and  
Yuying Children's Hospital of Wenzhou Medical University, Wenzhou 325027, P.R.  
China

<sup>2</sup> Department of Laboratory Medicine, The First Affiliated Hospital of Chongqing  
Medical University, Chongqing 400016, P.R. China

<sup>3</sup> Zhejiang Key Laboratory of Intelligent Cancer Biomarker Discovery and  
Translation, the First Affiliated Hospital, Wenzhou Medical University, Wenzhou  
325035, P.R. China.

<sup>4</sup> Oujiang Laboratory (Zhejiang Lab for Regenerative Medicine, Vision and Brain  
Health); Wenzhou Institute, University of Chinese Academy of Sciences, Wenzhou,  
Zhejiang 325000, P.R. China

<sup>5</sup> Clinical College of Neurology, Neurosurgery and Neurorehabilitation, Tianjin  
Medical University, Tianjin, 300070, China

\*Email: [zhanglx@ucas.edu.cn](mailto:zhanglx@ucas.edu.cn); [bianfeika@wmu.edu.cn](mailto:bianfeika@wmu.edu.cn); [hudanhong1982@126.com](mailto:hudanhong1982@126.com)

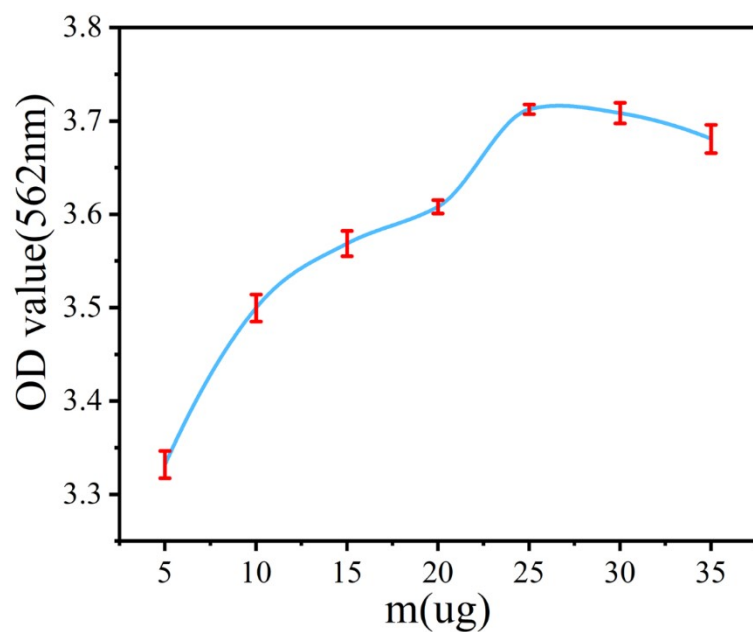

**Figure S1.** Changes in OD value at 562nm per mg of magnetic fluorescent microsphere-conjugated antibody content.

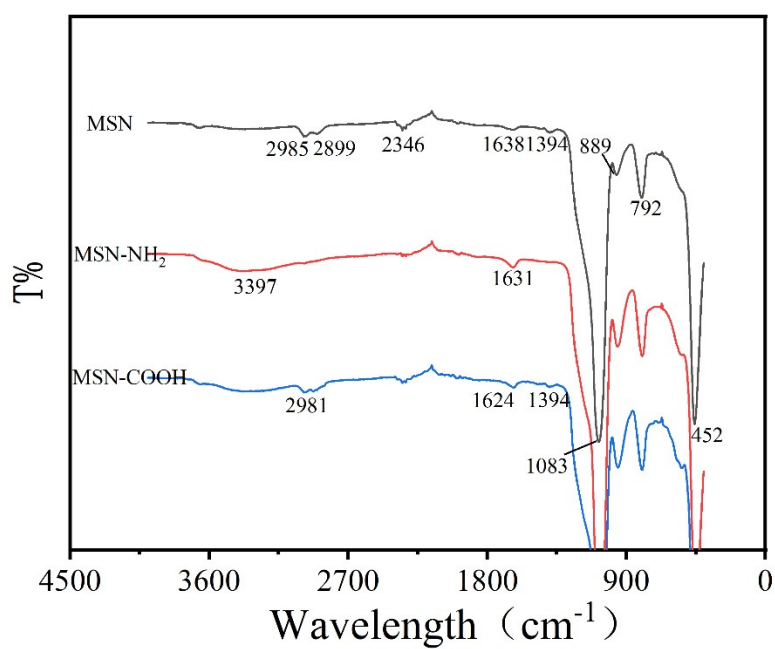

**Figure S2.** Infrared spectra of MSN modified amino and carboxyl groups.

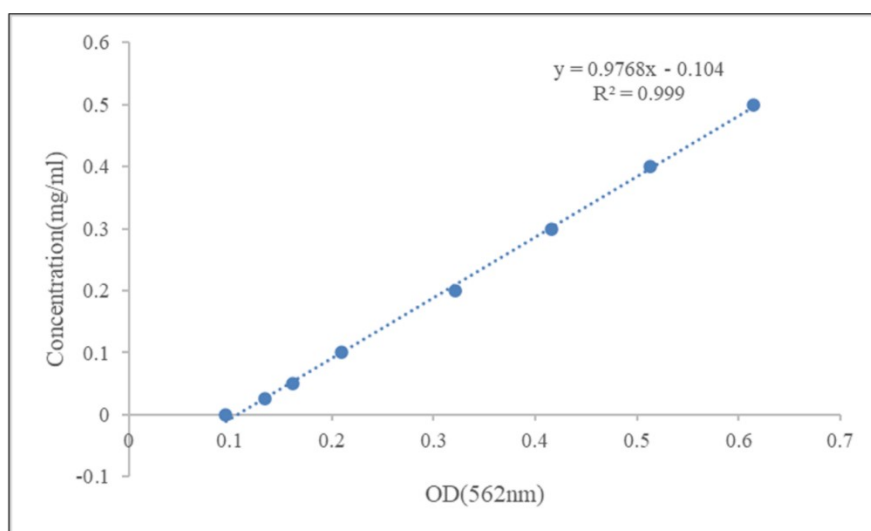

**Figure S3.** According to the BCA standard curve, the content of MSN coupling enzyme was calculated to be 91.06 $\mu$ g/mg.

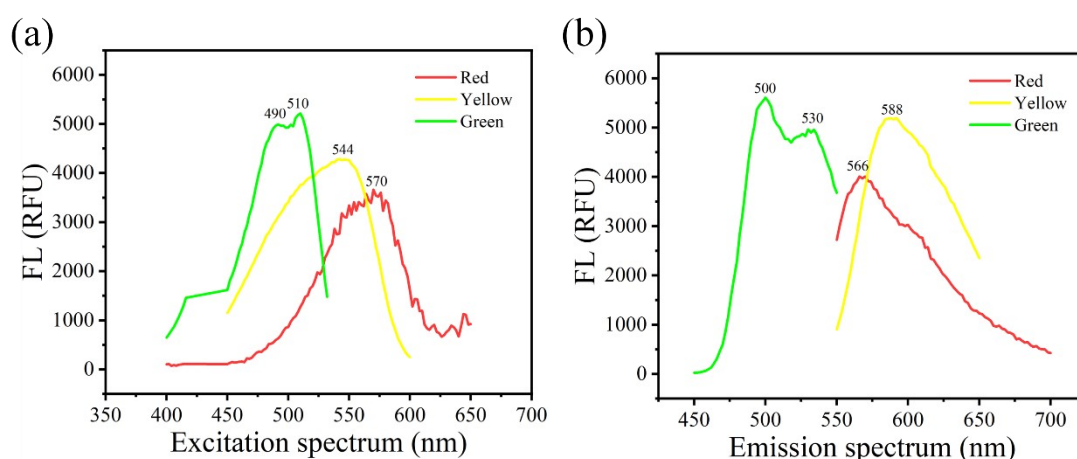

**Figure S4.** (a) Excitation spectra of three fluorescent microspheres. (b) Emission spectra of three fluorescent microspheres.

**Table S1.** Comparison of mesoporous silica and silica-immobilized enzyme content.

| Particles        | Immobilization method | Adsorption ( $\mu$ g/mg) | Desorption ( $\mu$ g/mg) |
|------------------|-----------------------|--------------------------|--------------------------|
| SiO <sub>2</sub> | Physical adsorption   | 12.69                    | 10.36                    |
| SiO <sub>2</sub> | Chemical adsorption   | 20                       | 0                        |
| MSN              | Physical adsorption   | 40.73                    | 36.37                    |

|     |                     |       |      |
|-----|---------------------|-------|------|
| MSN | Chemical adsorption | 91.48 | 0.28 |
|-----|---------------------|-------|------|

**Table S2.** The results of dual-channel dd ELISA for PCT and IL-6 were compared with those of chemiluminescence.

| Sample (no.) |      | Chemiluminescence (pg/mL) | dd ELISA (pg/mL) | Recovery (%) |
|--------------|------|---------------------------|------------------|--------------|
| 1            | PCT  | 230                       | 215.4            | 106.78       |
|              | IL-6 | 25.2                      | 27.4             | 91.97        |
| 2            | PCT  | 60                        | 68.6             | 87.46        |
|              | IL-6 | 136                       | 128.5            | 105.84       |
| 3            | PCT  | 50                        | 52.3             | 95.6         |
|              | IL-6 | 12.8                      | 13.5             | 94.81        |

**Table S3.** The results of single-channel dd ELISA for CRP were compared with those of immunoturbidimetry.

| Sample (no.) | Immunoturbidimetry (mg/L) | dd ELISA (mg/L) | Recovery (%) |
|--------------|---------------------------|-----------------|--------------|
| 1            | 9.1                       | 8.2             | 110.98       |
| 2            | 15.8                      | 14.9            | 106.04       |
| 3            | 64.2                      | 59.3            | 108.26       |
